# Supplementary material
Source: HighWire-hosted journal article supplement (https://www.annfammed.org/highwire/filestream/7559/field_highwire_adjunct_files/1/Jerant_suppl_table.pdf)
Supplement: Jerant_suppl_table.pdf [file Jerant_suppl_table.pdf]

**Online Supplementary Material**

Jerant AF, Franks P, Jackson JE, Doescher MP. Age-related disparities in cancer screening: analysis of 2001 behavioral risk factor surveillance system data. *Ann Fam Med.* 2004;2:481-487.

<http://www.annfammed.org/cgi/content/full/2/5/481/DC1>

**Supplemental Table. Screening by Population Characteristics of Persons Aged 50 to 80 or More Years Responding to the 2001 Behavioral Risk Factor Surveillance System Questionnaire**

| Characteristic                        | Screening Maneuver           |                                         |                        |
|---------------------------------------|------------------------------|-----------------------------------------|------------------------|
|                                       | Colorectal Cancer<br>No. (%) | Prostate-Specific<br>Antigen<br>No. (%) | Mammography<br>No. (%) |
| <b>Age-group, years</b>               |                              |                                         |                        |
| 50-54                                 | 19,495 (41.8)                | 7,818 (54.1)                            | 2,868 (80.9)           |
| 55-59                                 | 14,646 (53.8)                | 5,968 (66.6)                            | 2,162 (83.4)           |
| 60-64                                 | 12,150 (57.8)                | 4,821 (70.2)                            | 1,788 (79.8)           |
| 65-69                                 | 11,233 (62.6)                | 4,398 (75.7)                            | 1,739 (81.5)           |
| 70-74                                 | 10,220 (65.6)                | 3,813 (76.9)                            | 1,607 (77.5)           |
| 75-79                                 | 8,318 (65.0)                 | 2,782 (78.5)                            | 1,393 (75.5)           |
| ≥80                                   | 7,961 (58.5)                 | 2,276 (69.5)                            | 1,488 (61.2)           |
| <b>Sex</b>                            |                              |                                         |                        |
| Male                                  | 32,459 (55.9)                | 31,876 (67.8)                           | -----                  |
| Female                                | 51,564 (55.8)                | -----                                   | 13,045 (78.3)          |
| <b>Race/ethnicity</b>                 |                              |                                         |                        |
| White                                 | 68,490 (58.6)                | 26,096 (69.8)                           | 9,982 (78.4)           |
| African American                      | 5,349 (52.0)                 | 1,786 (68.2)                            | 1,172 (81.4)           |
| Other race                            | 3,002 (42.3)                 | 1,268 (54.3)                            | 926 (74.3)             |
| Multiracial                           | 1,175 (55.0)                 | 487 (61.5)                              | 267 (71.3)             |
| Hispanic                              | 5,124 (39.7)                 | 1,878 (56.3)                            | 579 (77.1)             |
| Refused                               | 883 (50.4)                   | 361 (64.3)                              | 119 (74.2)             |
| <b>Education (years of schooling)</b> |                              |                                         |                        |
| <1                                    | 233 (40.8)                   | 84 (63.2)                               | 34 (75.3)              |
| <9                                    | 6,249 (40.8)                 | 2,407 (49.9)                            | 999 (58.0)             |
| <12                                   | 7,362 (47.3)                 | 2,412 (59.6)                            | 1,376 (71.8)           |
| 12                                    | 2,7215 (54.1)                | 9,140 (65.6)                            | 4,529 (78.9)           |
| 13-15                                 | 20,468 (58.2)                | 7,202 (69.2)                            | 3,214 (79.6)           |
| ≥16                                   | 22,255 (62.5)                | 10,538 (74.5)                           | 2,843 (85.7)           |
| Refused                               | 241 (45.3)                   | 93 (58.2)                               | 50 (72.2)              |

*Continued*

Online Supplementary Data

<http://www.annfammed.org/cgi/content/full/2/5/481/DC1>

| Characteristic      | Screening Maneuver           |                                         |                        |
|---------------------|------------------------------|-----------------------------------------|------------------------|
|                     | Colorectal Cancer<br>No. (%) | Prostate-Specific<br>Antigen<br>No. (%) | Mammography<br>No. (%) |
| Income              | 6,187 (43.2)                 | 1,565 (48.8)                            | 1,052 (63.5)           |
| <\$10,000           | 5,708 (46.9)                 | 1,674 (54.2)                            | 1,004 (68.2)           |
| \$10,000 -<\$15,000 | 7,006 (51.6)                 | 2,229 (59.6)                            | 1,204 (69.9)           |
| \$15,000 -<\$20,000 | 7,802 (54.0)                 | 2,828 (64.5)                            | 1,326 (76.1)           |
| \$20,000 -<\$25,000 | 1,0541 (56.7)                | 4,180 (67.2)                            | 1,588 (78.8)           |
| \$25,000 -<\$35,000 | 1,1037 (57.0)                | 4,744 (70.6)                            | 1,587 (84.2)           |
| \$35,000 -<\$50,000 | 9,402 (57.8)                 | 4,472 (71.7)                            | 1,109 (86.4)           |
| \$50,000 -<\$75,000 | 1,0618 (62.0)                | 5,778 (74.6)                            | 1,046 (90.9)           |
| ≥\$75,000           | 6352 (51.6)                  | 1,212 (56.7)                            | 1,519 (71.5)           |
| Unknown             | 9,370 (61.5)                 | 3,194 (71.6)                            | 1,610 (81.1)           |
| Refused             | 9,370 (61.5)                 | 3,194 (71.6)                            | 1,610 (81.1)           |
| Health plan         | 78,053 (57.7)                | 29,453 (70.2)                           | 12,039 (80.1)          |
| Any                 | 5,857 (30.8)                 | 2,377 (37.2)                            | 975 (55.2)             |
| None                | 65 (44.0)                    | 26 (52.2)                               | 19 (35.3)              |
| Unknown             | 48 (56.1)                    | 20 (51.5)                               | 12 (53.7)              |
| Refused             | 48 (56.1)                    | 20 (51.5)                               | 12 (53.7)              |
| Self-rated health   | 13,592 (53.6)                | 5,555 (67.5)                            | 1,905 (79.1)           |
| Excellent           | 23,235 (56.7)                | 8,868 (69.7)                            | 3,578 (81.2)           |
| Very good           | 25,844 (56.8)                | 9,888 (68.7)                            | 4,042 (79.6)           |
| Good                | 14,132 (54.5)                | 5,001 (65.8)                            | 2,283 (77.0)           |
| Fair                | 6,859 (57.4)                 | 2,434 (63.0)                            | 1,177 (66.6)           |
| Poor                | 285 (51.5)                   | 103 (58.4)                              | 40 (48.4)              |
| Unknown             | 76 (36.3)                    | 27 (61.8)                               | 20 (89.5)              |
| Refused             | 76 (36.3)                    | 27 (61.8)                               | 20 (89.5)              |

Notes: percentages are weighted to reflect population averages. Number is number of persons responding. Not all states had questions on mammography.
